# Supplementary material for: Shape Reconstruction of Eccentric Defect in Cylindrical Component by Modified Born Approximation Method
Source: Hindawi journal article supplement (doi:10.1155/2022/3142637), 2022-05-17
Supplement: f1 [file 3142637.f1.pdf]

| <b>Serial Number</b> | <b>Time(s)</b> | <b>Volts(V)</b> |
|----------------------|----------------|-----------------|
| 1                    | 1.39E-05       | 0.0115          |
| 2                    | 1.39E-05       | 0.0117344       |
| 3                    | 1.39E-05       | 0.0117969       |
| 4                    | 1.39E-05       | 0.0120156       |
| 5                    | 1.3928E-05     | 0.0119219       |
| 6                    | 1.39E-05       | 0.0112969       |
| 7                    | 1.39E-05       | 0.0117344       |
| 8                    | 1.39E-05       | 0.0116875       |
| 9                    | 1.39E-05       | 0.0118438       |
| 10                   | 1.3932E-05     | 0.0119531       |
| 11                   | 1.39E-05       | 0.0120156       |
| 12                   | 1.39E-05       | 0.0116406       |
| 13                   | 1.39E-05       | 0.0119219       |
| 14                   | 1.39E-05       | 0.0116406       |
| 15                   | 1.3936E-05     | 0.0116406       |
| 16                   | 1.39E-05       | 0.0114219       |
| 17                   | 1.39E-05       | 0.0117656       |
| 18                   | 1.39E-05       | 0.0120313       |
| 19                   | 1.39E-05       | 0.012           |
| 20                   | 0.00001394     | 0.0117188       |
| 21                   | 1.39E-05       | 0.0120313       |
| 22                   | 1.39E-05       | 0.0119688       |
| 23                   | 1.39E-05       | 0.0118125       |
| 24                   | 1.39E-05       | 0.0117031       |
| 25                   | 1.3944E-05     | 0.0115938       |
| 26                   | 1.39E-05       | 0.0115938       |
| 27                   | 1.39E-05       | 0.0118281       |
| 28                   | 1.39E-05       | 0.0122031       |
| 29                   | 1.39E-05       | 0.0119531       |
| 30                   | 1.3948E-05     | 0.01225         |
| 31                   | 1.39E-05       | 0.0118281       |
| 32                   | 1.39E-05       | 0.0120469       |
| 33                   | 1.40E-05       | 0.0115781       |
| 34                   | 1.40E-05       | 0.0121094       |
| 35                   | 1.3952E-05     | 0.012           |
| 36                   | 1.40E-05       | 0.01225         |
| 37                   | 1.40E-05       | 0.011875        |
| 38                   | 1.40E-05       | 0.0117656       |
| 39                   | 1.40E-05       | 0.011875        |
| 40                   | 1.3956E-05     | 0.0121563       |
| 41                   | 1.40E-05       | 0.0120625       |
| 42                   | 1.40E-05       | 0.012125        |
| 43                   | 1.40E-05       | 0.0121094       |
| ⋮                    | ⋮              | ⋮               |
| 9998                 | 2.19E-05       | 0.00910938      |
| 9999                 | 2.19E-05       | 0.009           |
| 10000                | 2.1924E-05     | 0.00951563      |
